# Supplementary material
Source: Springer Nature journal article supplement (https://www.springermedizin.de/resource/supplementary/12865_2013_566_MOESM3_ESM.pdf/9428252)

A

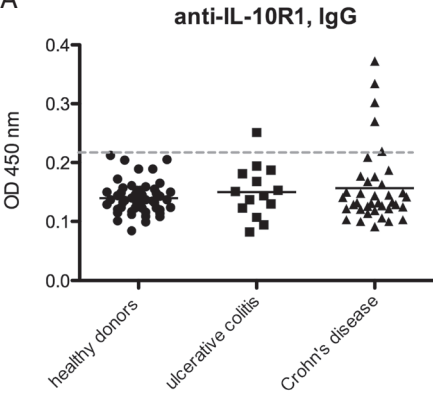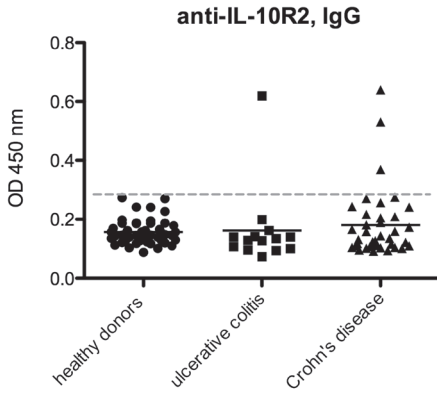

B

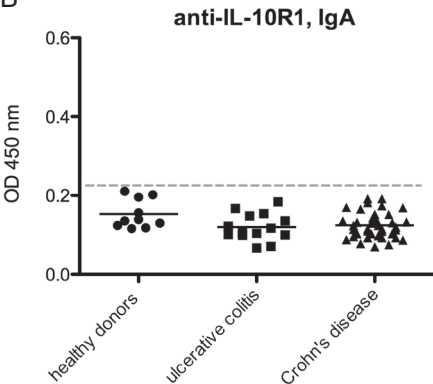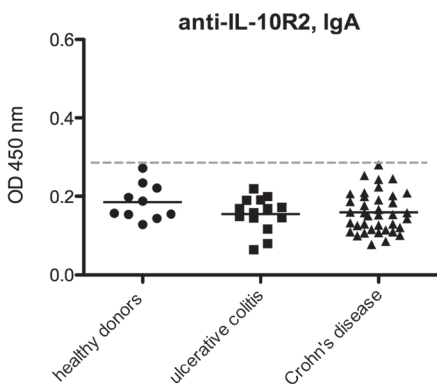

Supplement: MOESM3 [file 9428252]
